# Supplementary material for: Microscopic Diffusion Characteristics of Linear Alkylbenzene Sulfonates on the Surface of Anthracite: The Influence of Different Attachment Sites of Benzene Ring in the Backbone
Source: MDPI journal article supplement (doi:10.3390/min11101045), 2021-09-27
Supplement: s1 [file s1]

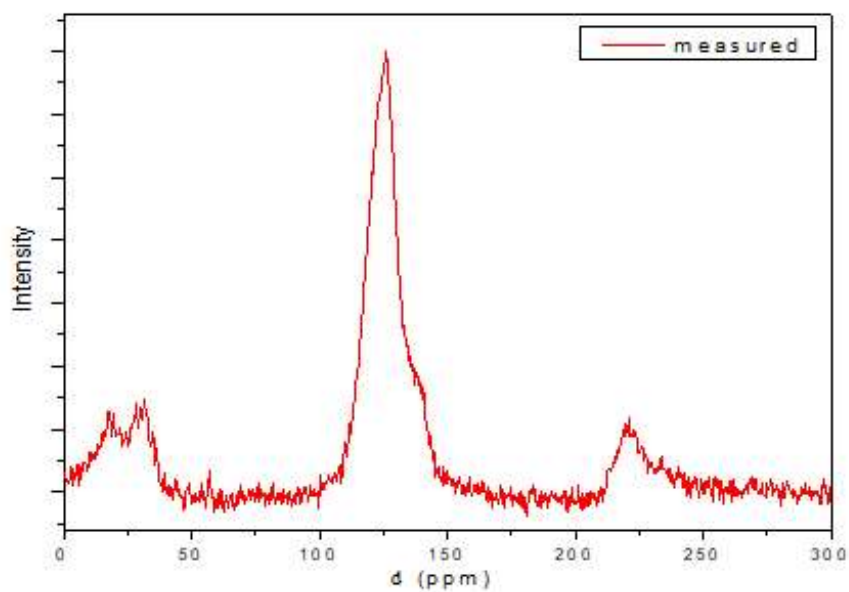

**Figure S1.**  $^{13}\text{C}$ —NMR spectra of JC anthracite coal sample.

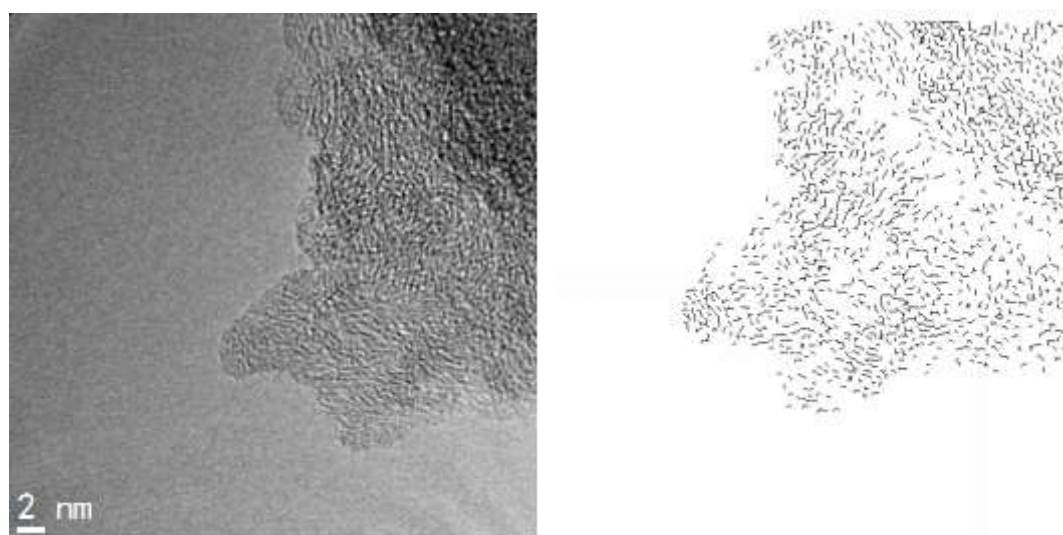

**Figure S2.** Diagram of image on lattice image of Jincheng anthracite coal.

**Table S1.** Structural assignment frequency obtained from lattice fringe data.

| Grouping by Fringe Length Range | Naphthalene | Anthracene | 2×2     | 3×3      | 4×4      | 5×5      | 6×6       | 7×7      | 8×8      |
|---------------------------------|-------------|------------|---------|----------|----------|----------|-----------|----------|----------|
| Length/nm                       | <0.44       | <0.59      | 5.9–9.9 | 1.0–1.49 | 1.5–1.99 | 2.0–2.49 | 2.50–2.99 | 3.0–3.49 | 3.5–3.99 |
| Freq./%                         | 1.6         | 2.6        | 45.5    | 26.2     | 12.5     | 6.9      | 3.1       | 0.6      | 1.0      |

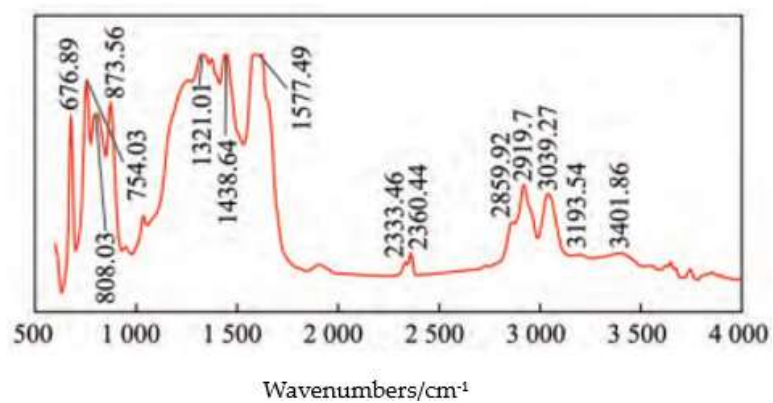

**Figure S3.** FTIR spectrum of JC anthracite coal sample.

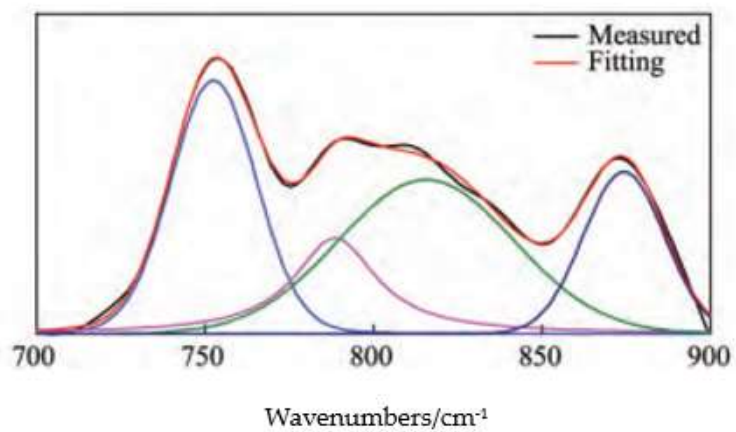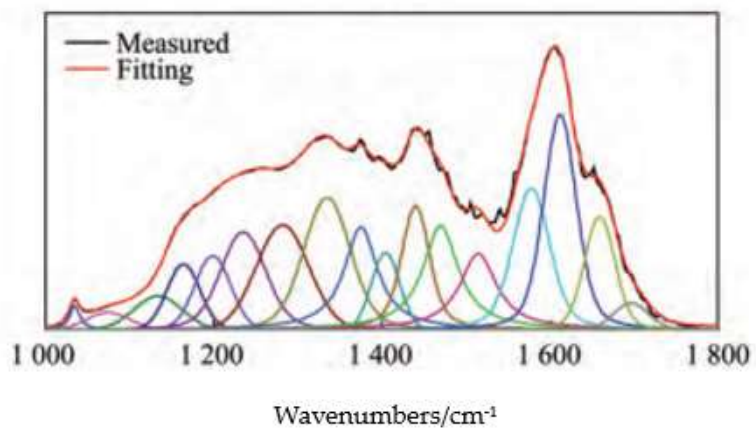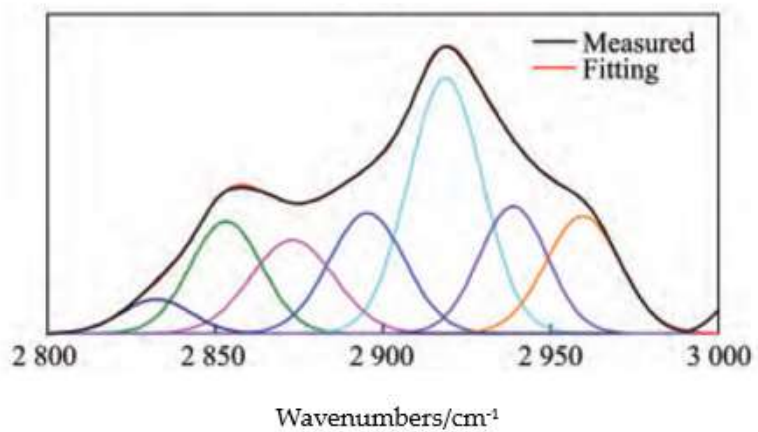

**Figure S4.** Curve-fitted spectrum in the 700–900, 1 000–1800 and 2800–3000 cm<sup>-1</sup> zone of JC anthracite coal sample.

**Table S2.** XPS C(1s), N(1s) and S(2p) data of JC anthracite coal sample.

| Element            | Attribution                   | Peak information |                    |
|--------------------|-------------------------------|------------------|--------------------|
|                    |                               | Position         | Relative content/% |
| C1s                | Graphite and Aliphatic carbon | 284.6            | 88.3               |
|                    | Alcohol,phenol or ether       | 286.2            | 10.1               |
|                    | Carbonyl group carbon         | 287.5            | 1.6                |
| N1s                | Pyridine nitrogen             | 398.1            | 21.7               |
|                    | Pyrrole nitrogen              | 400.0            | 52.7               |
|                    | Quaternary nitrogen           | 401.4            | 21.1               |
|                    | Nitrogen Oxides               | 402.9            | 4.5                |
| S2p <sub>3/2</sub> | Sulfide                       | 163.7            | 3.7                |
|                    | Thiophenic                    | 163.9            | 25.9               |
|                    | Sulphoxide                    | 165.7            | 9.7                |
|                    | Sulphone                      | 168.4            | 15.5               |
|                    | Sulphate                      | 170              | 11.9               |
| S2p <sub>1/2</sub> | Sulfide                       | 164.5            | 1.9                |
|                    | Thiophenic                    | 165.0            | 13.0               |
|                    | Sulphoxide                    | 166.9            | 4.8                |
|                    | Sulphone                      | 169.6            | 7.7                |
|                    | Sulphate                      | 171.2            | 5.9                |
